# Supplementary material for: Spontaneous formation of crystalline lithium molybdate from solid reagents at room temperature
Source: Royal Society of Chemistry journal article supplement (doi:10.1039/b908266b), 2009-08-13
Supplement: b908266b.pdf [file b908266b.pdf]

**Spontaneous Formation of Crystalline Lithium Molybdate  
from Solid Reagents at Room Temperature**

Thomas W. S. Yip, Claire Wilson and Edmund J. Cussen\*

**Supplementary Information**

## Supplementary Information

**Figure S1** Observed (dots), calculated (top line) and difference (bottom line) X-ray powder diffraction patterns collected from (i) sample **B** and (ii) sample **D**. The tick marks indicate the allowed Bragg reflections. Sample **B** contains a small quantity of  $\text{MoO}_3$  and the reflections due to this phase are represented by the upper set of marks.

**Figure S2** Thermal gravimetric data showing the variation in mass as a function of temperature for sample **A** of  $\text{Li}_2\text{MoO}_4$  heated under a dynamic atmosphere of dry helium. The mass and temperature are indicated by continuous and broken lines respectively.

**Figure S3** Calorimetric data collected on heating a 2:1 mixture of  $\text{LiOH}\cdot\text{H}_2\text{O}$  and  $\text{MoO}_3$  from  $-80\text{ }^\circ\text{C}$  to  $250\text{ }^\circ\text{C}$ . The sample was heated at a rate of  $5\text{ }^\circ\text{C min}^{-1}$  to  $3\text{ }^\circ\text{C}$ . This temperature was maintained for a period of 100 minutes before heating the mixture to  $250\text{ }^\circ\text{C}$  at  $5\text{ }^\circ\text{C min}^{-1}$ . The heat flow is indicated by the continuous line and positive and negative values indicate exo- and endothermic processes respectively. The temperature is indicated by a broken line.

**Figure S4** Calorimetric data collected from (i)  $\text{LiOH}\cdot\text{H}_2\text{O}$  and (ii)  $\text{MoO}_3$  heated from  $-80$  to  $200\text{ }^\circ\text{C}$  at  $1\text{ }^\circ\text{C min}^{-1}$  under a dynamic atmosphere of dry air. The heat flow is indicated by the continuous line and positive and negative values indicate exo- and endothermic processes respectively. The temperature is indicated by a broken line.

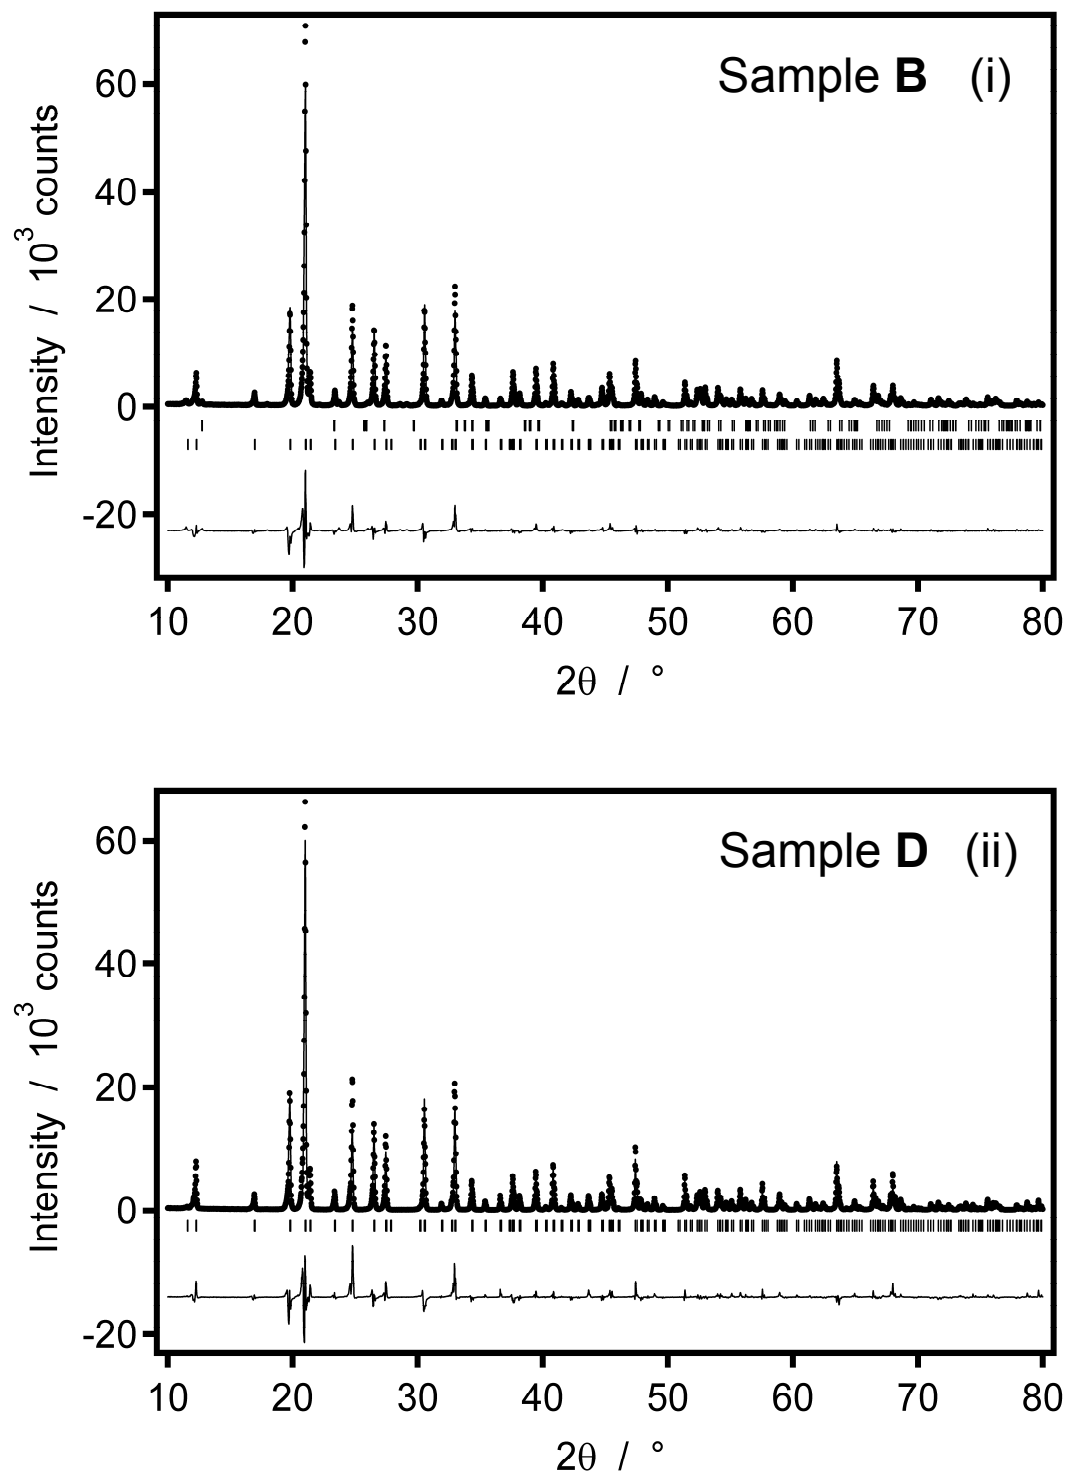

Figure S1

Observed (dots), calculated (top line) and difference (bottom line) X-ray powder diffraction patterns collected from (i) sample **B** and (ii) sample **D**. The tick marks indicate the allowed Bragg reflections. Sample **B** contains a small quantity of MoO<sub>3</sub> and the reflections due to this phase are represented by the upper set of tick marks.

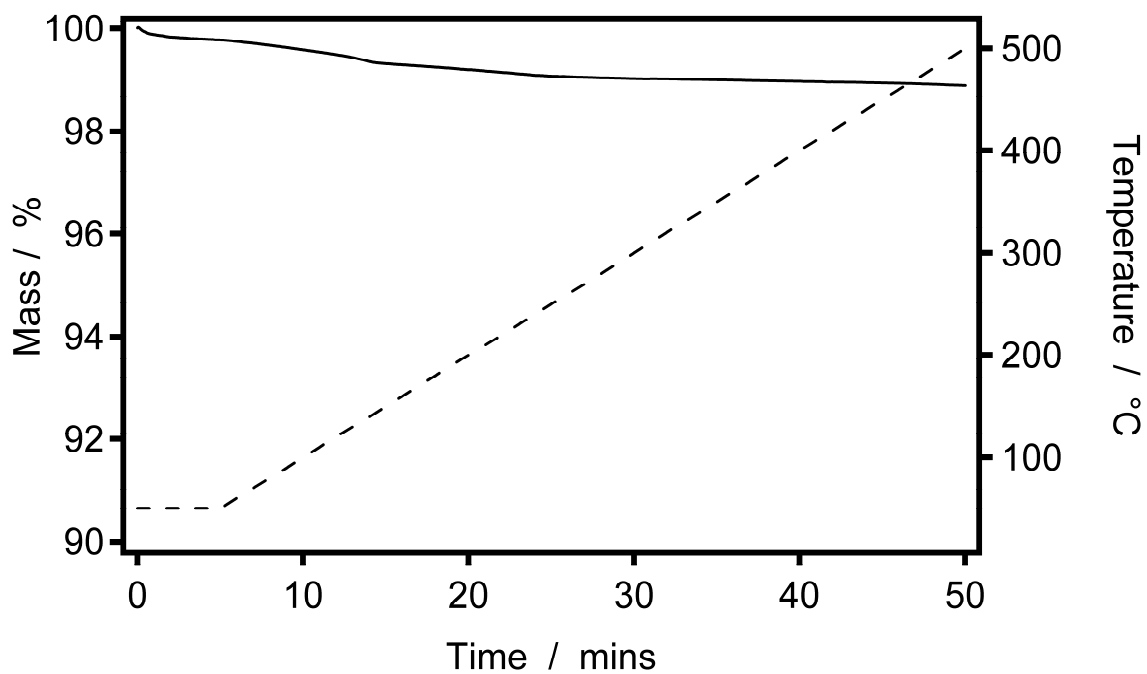

Figure S2

Thermal gravimetric data showing the variation in mass as a function of temperature for sample **A** of  $\text{Li}_2\text{MoO}_4$  heated under a dynamic atmosphere of dry helium. The mass and temperature are indicated by continuous and broken lines respectively.

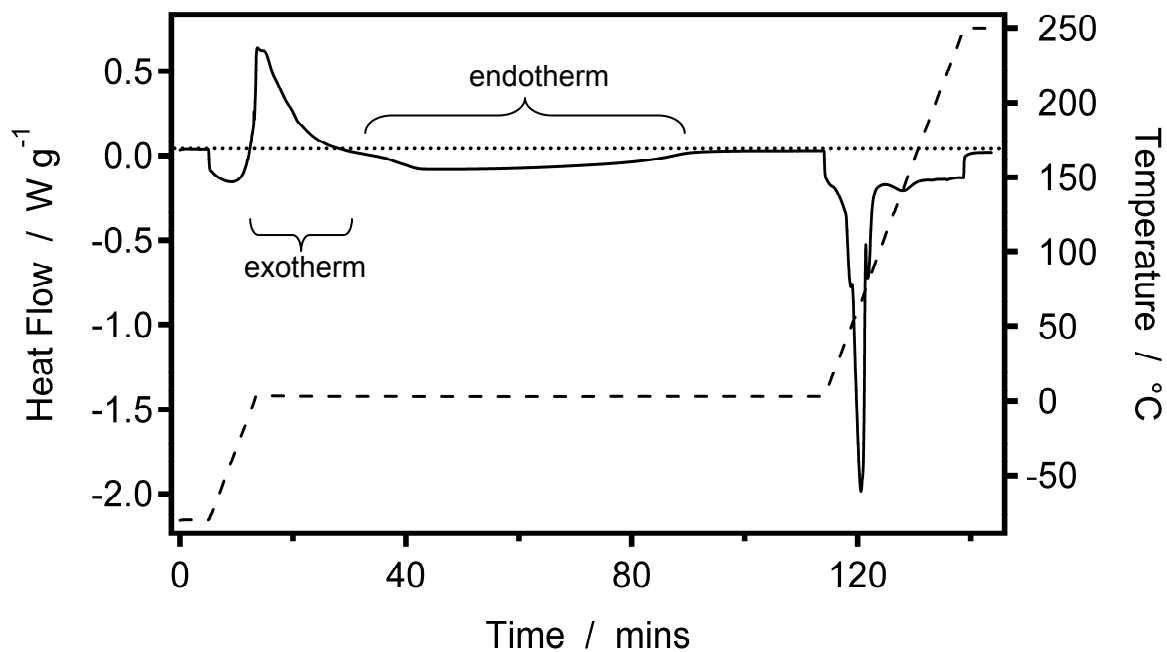

Figure S3

Calorimetric data collected on heating a 2:1 mixture of  $\text{LiOH}\cdot\text{H}_2\text{O}$  and  $\text{MoO}_3$  from  $-80\text{ }^\circ\text{C}$  to  $250\text{ }^\circ\text{C}$ . The sample was heated at a rate of  $5\text{ }^\circ\text{C min}^{-1}$  to  $3\text{ }^\circ\text{C}$ . This temperature was maintained for a period of 100 minutes before heating the mixture to  $250\text{ }^\circ\text{C}$  at  $5\text{ }^\circ\text{C min}^{-1}$ . The heat flow is indicated by the continuous line and positive and negative values indicate exo- and endothermic processes respectively. The temperature is indicated by a broken line.

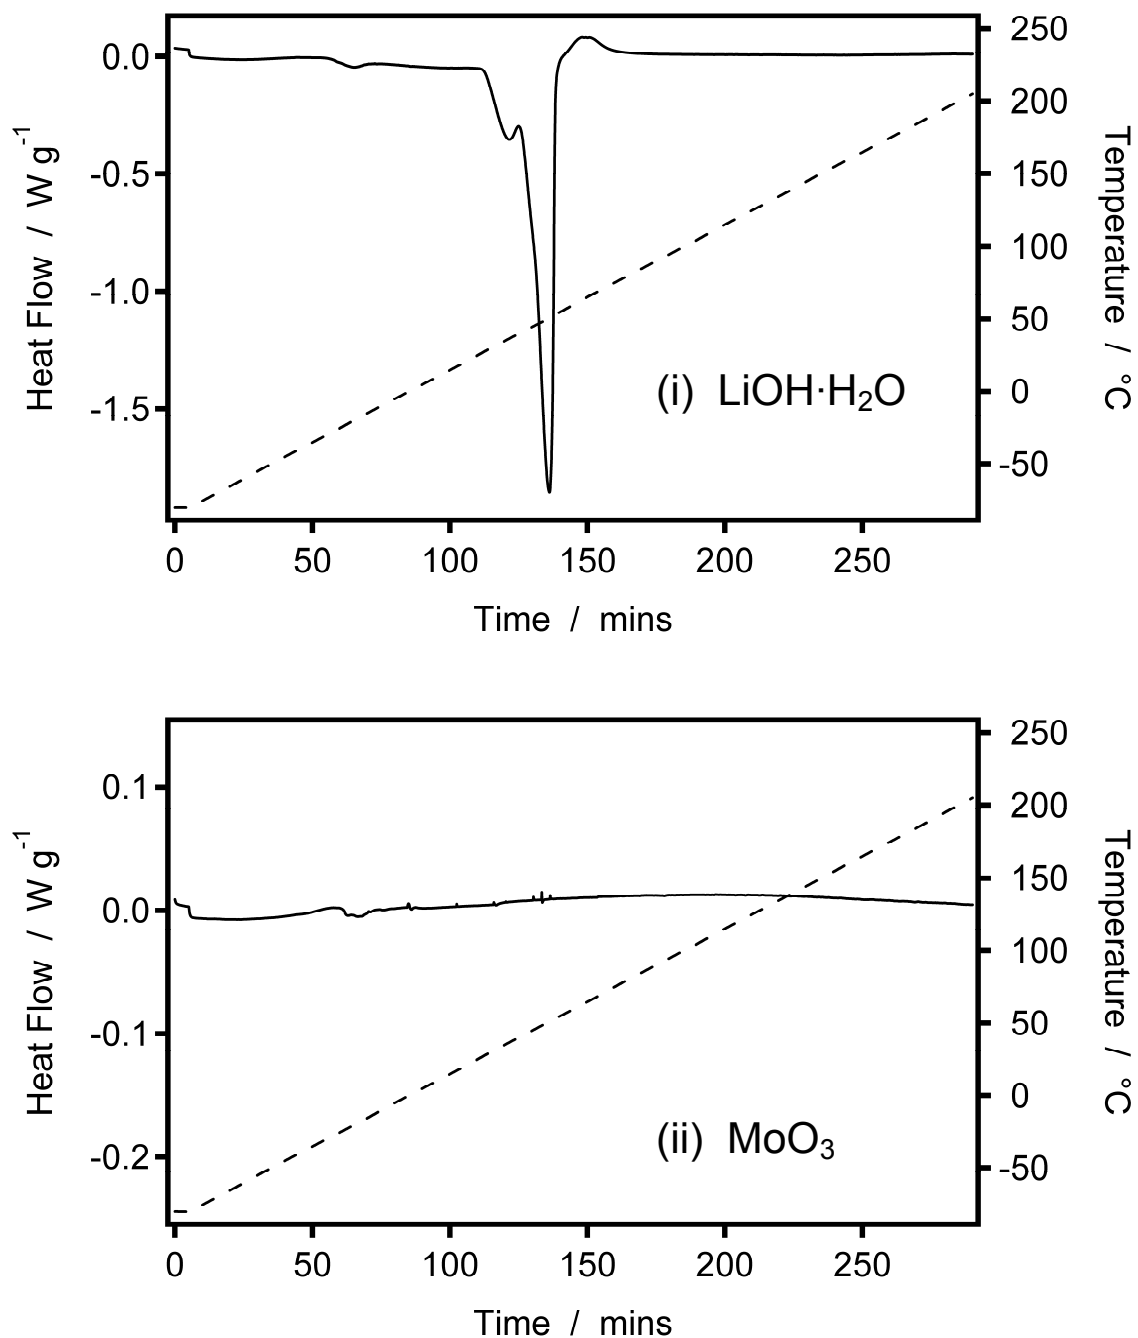

Figure S4

Calorimetric data collected from (i) LiOH·H<sub>2</sub>O and (ii) MoO<sub>3</sub> heated from -80 to 200 °C at 1 °C min<sup>-1</sup> under a dynamic atmosphere of dry air. The heat flow is indicated by the continuous line and positive and negative values indicate exo- and endothermic processes respectively. The temperature is indicated by a broken line.
